# Correction

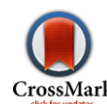

## Correction: The Role of Wildfire, Prescribed Fire, and Mountain Pine Beetle Infestations on the Population Dynamics of Black-Backed Woodpeckers in the Black Hills, South Dakota

The PLOS ONE Staff

In the Materials and Methods section, there are errors in the first paragraph of Estimating Adult and Juvenile Survival. The labels in the first equation should read “state at time  $t-1$ ” and “state at time  $t$ .” Please see the correct equation here:

$$\begin{array}{c} \text{state at time } t \\ \begin{array}{ccc} 1 & 2 & 3 \end{array} \\ \text{state at time } t-1 \end{array} \begin{pmatrix} d_{it}\Phi_{it} & d_{it}(1-\Phi_{it}) & (1-d_{it})(\Phi_{it}+[1-\Phi_{it}]) \\ 0 & 1 & 0 \\ d_{it}\Phi_{it} & d_{it}(1-\Phi_{it}) & (1-d_{it})(\Phi_{it}+[1-\Phi_{it}]) \end{pmatrix}$$

There is an error in the second equation. Please see the correct equation here:

$$\text{state}_t \sim \text{multinomial}(\mathbf{M}_{t-1}, 1)$$

The penultimate sentence of the paragraph should read “Survival probability, denoted  $\Phi_{it}$ , is the probability woodpecker  $i$  is alive at the end of time step  $t$ .”

### Reference

1. Rota CT, Millsbaugh JJ, Rumble MA, Lehman CP, Kesler DC (2014) The Role of Wildfire, Prescribed Fire, and Mountain Pine Beetle Infestations on the Population Dynamics of Black-Backed Woodpeckers in the Black Hills, South Dakota. PLoS ONE 9(4): e94700. doi:10.1371/journal.pone.0094700

**Citation:** The PLOS ONE Staff (2014) Correction: The Role of Wildfire, Prescribed Fire, and Mountain Pine Beetle Infestations on the Population Dynamics of Black-Backed Woodpeckers in the Black Hills, South Dakota. PLoS ONE 9(8): e106390. doi:10.1371/journal.pone.0106390

**Published:** August 22, 2014

**Copyright:** © 2014 The PLOS ONE Staff. This is an open-access article distributed under the terms of the Creative Commons Attribution License, which permits unrestricted use, distribution, and reproduction in any medium, provided the original author and source are credited.
